# Supplementary material
Source: publisher figshare collection journal article supplement (https://asha.figshare.com/articles/dataset/_/5734113)
Supplement: Supplementary file 1 [file 1]

**Supplemental Material S5.** Treatment list progression based on naming probe accuracy (sample).

| Treatment day | Probe       | Treated list # | Treated list probe accuracy (%) |
|---------------|-------------|----------------|---------------------------------|
| <b>1*</b>     | All lists   | 1              | 20                              |
| <b>2</b>      | List 1      | 1              | 60                              |
| <b>3</b>      | List 1      | 1              | 80                              |
| <b>4</b>      | List 1      | 1              | 80                              |
| <b>5</b>      | All lists** | 1              | 60                              |
| <b>6</b>      | List 1/2*** | 2              | 80, 20                          |
| <b>7</b>      | List 2      | 2              | 40                              |
| <b>8</b>      | List 2      | 2              | 80                              |
| <b>9</b>      | All lists   | 2              | 40                              |
| <b>10</b>     | List 2      | 2              | 100                             |
| <b>11</b>     | List 2/3    | 3              | 100, 20                         |
| <b>12</b>     | List 3      | 3              | 60                              |
| <b>13</b>     | All lists   | 3              | 60                              |
| <b>14</b>     | List 3      | 3              | 60                              |
| <b>15</b>     | List 3      | 3              | 60                              |
| <b>16</b>     | List 3      | 3              | 60                              |
| <b>17****</b> | All lists   | 3              | 80                              |

\*Naming probe accuracy for all lists on Day 1 constitute **Entry** data for this study. \*\*Naming probe accuracy for all lists was obtained every fourth treatment day, although only accuracy on the treated list was used for advancement eligibility. \*\*\*If a participant met advancement criteria (at least 80% accuracy on three of the last four naming probes for the currently treated list) during a morning naming probe the subsequent list was also probed.

\*\*\*\*Naming probes were administered in the morning of the final treatment day according to the probe schedule. All lists were also probed at the end of the final treatment session to obtain study **Exit** data.
