# Supplementary material
Source: publisher figshare collection journal article supplement (https://asha.figshare.com/articles/dataset/_/5734113)
Supplement: Supplementary file 2 [file 1]

**Supplemental Material S4.** Treatment fidelity checklist.

## Treatment Fidelity Checklist

**Treating Clinician:** \_\_\_\_\_

**Observer:** \_\_\_\_\_

**Date:** \_\_\_\_\_

### SFA Treatment

|                                                                                                                                                                                                   |                          |
|---------------------------------------------------------------------------------------------------------------------------------------------------------------------------------------------------|--------------------------|
| Clinician asks the participant to name the target at the beginning of the trial                                                                                                                   | <input type="checkbox"/> |
| Feature and target responses are only accepted and written on the chart if generated in the verbal modality                                                                                       | <input type="checkbox"/> |
| Target/feature names are reinforced by the clinician only after participant generates the target/feature                                                                                          | <input type="checkbox"/> |
| The participant is guided through 5 categories in order: group, properties, function, context, other/personal                                                                                     | <input type="checkbox"/> |
| Weak or inaccurate responses are not written on the chart                                                                                                                                         | <input type="checkbox"/> |
| For each trial, the participant is exposed to a total of 3 features per category (except Group and Other/Association = 1 feature exposure)                                                        | <input type="checkbox"/> |
| No more than 2 prompts are provided for inaccurate and weak responses                                                                                                                             | <input type="checkbox"/> |
| Prompts (i.e., specific/clarification and forced choice) are not provided after the participant has already generated 2 features within a category                                                | <input type="checkbox"/> |
| 5–10 second response windows are provided without significant deviations                                                                                                                          | <input type="checkbox"/> |
| Clinician asks the participant to name the target at the end of trial (regardless of accuracy at trial initiation)                                                                                | <input type="checkbox"/> |
| The review procedure is initiated when the participant does not accurately name the target at the end of the trial (according to specified target accuracy criteria)                              | <input type="checkbox"/> |
| 1 salient feature is chosen from each category, the clinician reviews the features repeatedly producing the target word, then asks participant to name the target again, provides model if needed | <input type="checkbox"/> |

## Sentence Generation Task

|                                                                                                                                            |                          |
|--------------------------------------------------------------------------------------------------------------------------------------------|--------------------------|
| Sentence generation task immediately follows each SFA trial                                                                                | <input type="checkbox"/> |
| The task is completed in the verbal modality only                                                                                          | <input type="checkbox"/> |
| Components of the sentence are accepted in the verbal modality only                                                                        | <input type="checkbox"/> |
| Participant is given up to 10 seconds to respond after initial instructions and after cues                                                 | <input type="checkbox"/> |
| Participant is given up to 2 verbal cues to assist with generation or modification of response as needed                                   | <input type="checkbox"/> |
| A semantically loaded sentence is provided by the clinician if the participant cannot generate a semantically loaded sentence after 2 cues | <input type="checkbox"/> |
| If the clinician provides a semantically loaded sentence, the participant is asked to repeat the sentence ×1                               | <input type="checkbox"/> |
| Only sentences with the target word are accepted and reinforced                                                                            | <input type="checkbox"/> |
| Sentences with 2/3 semantically related words are accepted and reinforced                                                                  | <input type="checkbox"/> |
