# Supplementary material
Source: publisher figshare collection journal article supplement (https://asha.figshare.com/articles/dataset/_/5734113)
Supplement: Supplementary file 3 [file 1]

## Supplemental Material S1. Supplemental language testing results.

| Subject         | Philadelphia Naming Test |              |              | Pyramids and Palm Trees | PALPA 02 <sup>a</sup> |           | PALPA 15 <sup>b</sup> |                  | PALPA 49 <sup>c</sup> | PALPA 50 <sup>d</sup> |
|-----------------|--------------------------|--------------|--------------|-------------------------|-----------------------|-----------|-----------------------|------------------|-----------------------|-----------------------|
|                 | Total correct            | s-weight     | p-weight     | 3-Picture               | Same                  | Different | Written overall       | Auditory overall | Overall               | Overall               |
| <b>S1</b>       | 122                      | .0238        | .0238        | .942                    | .917                  | .556      | .533                  | .85              | .767                  | .733                  |
| <b>S2</b>       | 142                      | .0338        | .0188        | .96                     | 1                     | .9444     | .62                   | .98              | .82                   | .95                   |
| <b>S3</b>       | 72                       | .02          | .02          | .7885                   | .9444                 | .9722     | .5                    | .9167            | .6667                 | .5333                 |
| <b>S4</b>       | 58                       | .0151        | .0151        | .94                     | .97                   | 1         | .47                   | .85              | .72                   | .82                   |
| <b>S5</b>       | 156                      | .0363        | .0263        | .9615                   | 1                     | 1         | .9833                 | 1                | .9333                 | .8667                 |
| <b>S6</b>       | 144                      | .0313        | .0213        | .9615                   | .9167                 | .9722     | .75                   | .8833            | .8167                 | .8167                 |
| <b>S7</b>       | 141                      | .0275        | .035         | .923                    | .972                  | .972      | .833                  | .983             | .883                  | .9                    |
| <b>S8</b>       | 110                      | .02          | .0275        | .8846                   | .1389                 | .8056     | .5833                 | .7               | .7833                 | .7833                 |
| <b>S9</b>       | 45                       | .0126        | .0275        | .9038                   | .9722                 | .9444     | .5667                 | .9833            | .7833                 | .8167                 |
| <b>S10</b>      | 137                      | .0313        | .0188        | .7692                   | .8611                 | 1         | 68.33                 | 1                | .8667                 | .9167                 |
| <b>S11</b>      | 86                       | .0188        | .0213        | .9615                   | .9167                 | 1         | .6667                 | .9333            | .7833                 | .75                   |
| <b>S12</b>      | 133                      | .0275        | .02          | .9038                   | 1                     | 1         | .55                   | .7833            | .7333                 | .5333                 |
| <b>S13</b>      | 74                       | .0213        | .0138        | .8846                   | 1                     | .9722     | .6                    | .9833            | .8166                 | .6666                 |
| <b>S14</b>      | 124                      | .0263        | .0213        | .923                    | .8611                 | .5555     | .8333                 | .8333            | .6                    | .8166                 |
| <b>S15</b>      | 85                       | .0176        | .0275        | .9615                   | 1                     | .9722     | .8666                 | .9833            | .9166                 | .9833                 |
| <b>S16</b>      | 141                      | .04          | .0176        | .9038                   | 1                     | 1         | .8833                 | 1                | .9833                 | .9667                 |
| <b>S17</b>      | 142                      | .0263        | .0263        | .9615                   | 1                     | 1         | .95                   | .9833            | .9333                 | .95                   |
| <b>AVG (SD)</b> | 112 (35)                 | .0253 (.008) | .0225 (.005) | .91 (.06)               | .91 (.20)             | .92 (.15) | .7 (.16)              | .92 (.09)        | .81 (.1)              | .81 (.14)             |

*Note.* Philadelphia Naming Test (PNT; Roach, Schwartz, Martin, Grewal, & Brecher, 1996); Pyramids and Palm Trees (PPT; Howard & Patterson, 1992); PALPA = Psycholinguistic Assessments of Language Processing in Aphasia (Kay, Lesser, & Coltheart, 1996).

<sup>a</sup>Minimal Pair Same/Different Judgment. <sup>b</sup>Word Rhyme Judgment. <sup>c</sup>Auditory Synonym Judgment. <sup>d</sup>Written Synonym Judgment.

## References

- Howard, D., & Patterson, K. E. (1992). *The Pyramids and Palm Trees Test: A test of semantic access from words and pictures*. Hove, England: Thames Valley Test Company.
- Kay, J., Lesser, R., & Coltheart, M. (1996). Psycholinguistic Assessments of Language Processing in Aphasia (PALPA): An introduction. *Aphasiology*, 10(2), 159–18.
- Roach, A., Schwartz, M. F., Martin, N., Grewal, R. S., & Brecher, A. (1996). The Philadelphia Naming Test: Scoring and rationale. *Clinical Aphasiology*, 24, 121–133.
