# Supplementary material
Source: publisher figshare collection journal article supplement (https://asha.figshare.com/articles/dataset/_/5734113)
Supplement: Supplementary file 4 [file 1]

## Supplemental Material S2. Determination of eligible treatment items based on naming task performance (sample).

To be eligible for selection for treatment, an item had to be named correctly on no more than one of three naming opportunities (i.e., it had to receive a score of 0 on two of three administrations of the naming task). Items in green were not named correctly on both of the first two administrations of the naming task and were therefore *eligible* for treatment. Items in red were named correctly on both of the first two administrations and were therefore *not eligible* for treatment. Items in blue were named correctly on only one of the first two administrations of the naming task and were therefore *tested a third time*. Items that the participant *failed to* name correctly during this third administration were added to the list of eligible treatment items (items in bold).

| ITEM            | CATEGORY            | ADMIN 1 | ADMIN 2 | SUM 1 and 2 | ADMIN 3 | FINAL |
|-----------------|---------------------|---------|---------|-------------|---------|-------|
| hot air balloon | Transportation      | 0       | 0       | 0           |         | 0     |
| water bottle    | Sports Equipment    | 0       | 0       | 0           |         | 0     |
| tool belt       | Tools               | 0       | 0       | 0           |         | 0     |
| garlic          | Fruits & Vegetables | 0       | 0       | 0           |         | 0     |
| golf ball       | Sports Equipment    | 0       | 0       | 0           |         | 0     |
| fisherman       | Occupations         | 0       | 0       | 0           |         | 0     |
| cruise ship     | Transportation      | 0       | 0       | 0           |         | 0     |
| paintbrush      | Tools               | 0       | 0       | 0           |         | 0     |
| chainsaw        | Tools               | 0       | 0       | 0           |         | 0     |
| cleat           | Sports Equipment    | 0       | 0       | 0           |         | 0     |
| maracas         | Musical Instruments | 0       | 0       | 0           |         | 0     |
| trombone        | Musical Instruments | 0       | 0       | 0           |         | 0     |
| keyboard        | Musical Instruments | 0       | 0       | 0           |         | 0     |
| eggplant        | Fruits & Vegetables | 0       | 0       | 0           |         | 0     |
| screw           | Tools               | 0       | 0       | 0           |         | 0     |
| cantaloupe      | Fruits & Vegetables | 0       | 0       | 0           |         | 0     |
| toolbox         | Tools               | 0       | 0       | 0           |         | 0     |
| washboard       | Musical Instruments | 0       | 0       | 0           |         | 0     |
| volleyball      | Sports Equipment    | 0       | 0       | 0           |         | 0     |
| diving board    | Sports Equipment    | 0       | 0       | 0           |         | 0     |
| tape measure    | Tools               | 0       | 0       | 0           |         | 0     |
| harmonica       | Musical Instruments | 0       | 0       | 0           |         | 0     |
| janitor         | Occupations         | 0       | 0       | 0           |         | 0     |
| tricycle        | Transportation      | 0       | 0       | 0           |         | 0     |
| pelican         | Birds               | 0       | 0       | 0           |         | 0     |
| grapefruit      | Fruits & Vegetables | 0       | 0       | 0           |         | 0     |
| skateboard      | Transportation      | 0       | 0       | 0           |         | 0     |
| shin guards     | Sports Equipment    | 0       | 0       | 0           |         | 0     |
| cucumber        | Fruits & Vegetables | 0       | 0       | 0           |         | 0     |
| hockey stick    | Sports Equipment    | 0       | 0       | 0           |         | 0     |
| bassoon         | Musical Instruments | 0       | 0       | 0           |         | 0     |
| mouth guard     | Sports Equipment    | 0       | 0       | 0           |         | 0     |
| ice skate       | Sports Equipment    | 0       | 0       | 0           |         | 0     |
| organ           | Musical Instruments | 0       | 0       | 0           |         | 0     |
| squash          | Fruits & Vegetables | 0       | 0       | 0           |         | 0     |
| artichoke       | Fruits & Vegetables | 0       | 0       | 0           |         | 0     |
| drill           | Tools               | 0       | 0       | 0           |         | 0     |
| blackberries    | Fruits & Vegetables | 0       | 0       | 0           |         | 0     |
| space shuttle   | Transportation      | 0       | 0       | 0           |         | 0     |
| armadillo       | 4-Legged Animals    | 0       | 0       | 0           |         | 0     |
| xylophone       | Musical Instruments | 0       | 0       | 0           |         | 0     |
| basketball hoop | Sports Equipment    | 0       | 0       | 0           |         | 0     |
| goggles         | Tools               | 0       | 0       | 0           |         | 0     |
| duct tape       | Tools               | 0       | 0       | 0           |         | 0     |
| chef            | Occupations         | 0       | 0       | 0           |         | 0     |
| cauliflower     | Fruits & Vegetables | 0       | 0       | 0           |         | 0     |
| flamingo        | Birds               | 0       | 0       | 0           |         | 0     |
| spinach         | Fruits & Vegetables | 0       | 0       | 0           |         | 0     |
| nut             | Tools               | 0       | 0       | 0           |         | 0     |
| blueprint       | Tools               | 0       | 0       | 0           |         | 0     |

|                |                     |   |   |   |   |   |
|----------------|---------------------|---|---|---|---|---|
| astronaut      | Occupations         | 0 | 0 | 0 |   | 0 |
| surfboard      | Transportation      | 0 | 0 | 0 |   | 0 |
| tennis net     | Sports Equipment    | 0 | 0 | 0 |   | 0 |
| kiwi           | Fruits & Vegetables | 0 | 0 | 0 |   | 0 |
| avocado        | Fruits & Vegetables | 0 | 0 | 0 |   | 0 |
| tambourine     | Musical Instruments | 0 | 0 | 0 |   | 0 |
| kneepads       | Sports Equipment    | 0 | 0 | 0 |   | 0 |
| ballerina      | Occupations         | 0 | 0 | 0 |   | 0 |
| sweet potato   | Fruits & Vegetables | 0 | 0 | 0 |   | 0 |
| sheep          | 4-Legged Animals    | 0 | 0 | 0 |   | 0 |
| giraffe        | 4-Legged Animals    | 0 | 0 | 0 |   | 0 |
| honeydew       | Fruits & Vegetables | 0 | 0 | 0 |   | 0 |
| rhinoceros     | 4-Legged Animals    | 0 | 0 | 0 |   | 0 |
| parrot         | Birds               | 0 | 0 | 0 |   | 0 |
| coconut        | Fruits & Vegetables | 0 | 0 | 0 |   | 0 |
| farmer         | Occupations         | 0 | 0 | 0 |   | 0 |
| golf cart      | Transportation      | 0 | 0 | 0 |   | 0 |
| toucan         | Birds               | 0 | 0 | 0 |   | 0 |
| rollerblade    | Transportation      | 0 | 0 | 0 |   | 0 |
| director       | Occupations         | 0 | 0 | 0 |   | 0 |
| plum           | Fruits & Vegetables | 0 | 0 | 0 |   | 0 |
| pliers         | Tools               | 0 | 0 | 0 |   | 0 |
| pomegranate    | Fruits & Vegetables | 0 | 0 | 0 |   | 0 |
| photographer   | Occupations         | 0 | 0 | 0 |   | 0 |
| hockey goal    | Sports Equipment    | 0 | 0 | 0 |   | 0 |
| rat            | 4-Legged Animals    | 0 | 0 | 0 |   | 0 |
| soccer ball    | Sports Equipment    | 0 | 0 | 0 |   | 0 |
| calculator     | Tools               | 0 | 0 | 0 |   | 0 |
| triangle       | Musical Instruments | 0 | 0 | 0 |   | 0 |
| asparagus      | Fruits & Vegetables | 0 | 0 | 0 |   | 0 |
| unicycle       | Transportation      | 0 | 0 | 0 |   | 0 |
| (bell)pepper   | Fruits & Vegetables | 1 | 0 | 1 | 0 | 1 |
| horn           | Musical Instruments | 0 | 1 | 1 | 0 | 1 |
| hippo          | 4-Legged Animals    | 1 | 0 | 1 | 0 | 1 |
| seagull        | Birds               | 0 | 1 | 1 | 0 | 1 |
| kangaroo       | 4-Legged Animals    | 1 | 0 | 1 | 0 | 1 |
| screwdriver    | Tools               | 0 | 1 | 1 | 0 | 1 |
| clarinet       | Musical Instruments | 1 | 0 | 1 | 0 | 1 |
| accordion      | Musical Instruments | 0 | 1 | 1 | 0 | 1 |
| wrench         | Tools               | 1 | 0 | 1 | 0 | 1 |
| woodpecker     | Birds               | 0 | 1 | 1 | 0 | 1 |
| scooter        | Transportation      | 0 | 1 | 1 | 0 | 1 |
| hinge          | Tools               | 1 | 0 | 1 | 0 | 1 |
| blimp          | Transportation      | 0 | 1 | 1 | 0 | 1 |
| maid           | Occupations         | 0 | 1 | 1 | 0 | 1 |
| washer         | Tools               | 1 | 0 | 1 | 0 | 1 |
| hardhat        | Tools               | 0 | 1 | 1 | 0 | 1 |
| leopard        | 4-Legged Animals    | 0 | 1 | 1 | 1 | 2 |
| mailman        | Occupations         | 1 | 0 | 1 | 1 | 2 |
| bolt           | Tools               | 1 | 0 | 1 | 1 | 2 |
| glue           | Tools               | 1 | 0 | 1 | 1 | 2 |
| lime           | Fruits & Vegetables | 0 | 1 | 1 | 1 | 2 |
| baseball glove | Sports Equipment    | 1 | 0 | 1 | 1 | 2 |
| sailboat       | Transportation      | 0 | 1 | 1 | 1 | 2 |
| painter        | Occupations         | 0 | 1 | 1 | 1 | 2 |
| trumpet        | Musical Instruments | 1 | 0 | 1 | 1 | 2 |
| blueberries    | Fruits & Vegetables | 1 | 0 | 1 | 1 | 2 |
| raspberries    | Fruits & Vegetables | 0 | 1 | 1 | 1 | 2 |
| pilot          | Occupations         | 1 | 0 | 1 | 1 | 2 |
| peacock        | Birds               | 0 | 1 | 1 | 1 | 2 |
| swan           | Birds               | 0 | 1 | 1 | 1 | 2 |
| lemon          | Fruits & Vegetables | 0 | 1 | 1 | 1 | 2 |
| cymbal         | Musical Instruments | 1 | 0 | 1 | 1 | 2 |
| goose          | Birds               | 1 | 0 | 1 | 1 | 2 |
| anteater       | 4-Legged Animals    | 0 | 1 | 1 | 1 | 2 |
| radish         | Fruits & Vegetables | 1 | 1 | 2 |   | 2 |

|                |                     |   |   |   |   |
|----------------|---------------------|---|---|---|---|
| gorilla        | 4-Legged Animals    | 1 | 1 | 2 | 2 |
| bicycle        | Transportation      | 1 | 1 | 2 | 2 |
| mouse          | 4-Legged Animals    | 1 | 1 | 2 | 2 |
| tennis racquet | Sports Equipment    | 1 | 1 | 2 | 2 |
| taxi           | Transportation      | 1 | 1 | 2 | 2 |
| swimsuit       | Sports Equipment    | 1 | 1 | 2 | 2 |
| broccoli       | Fruits & Vegetables | 1 | 1 | 2 | 2 |
| raccoon        | 4-Legged Animals    | 1 | 1 | 2 | 2 |
| truck          | Transportation      | 1 | 1 | 2 | 2 |
| ostrich        | Birds               | 1 | 1 | 2 | 2 |
| mushroom       | Fruits & Vegetables | 1 | 1 | 2 | 2 |
| bluebird       | Birds               | 1 | 1 | 2 | 2 |
| chicken        | Birds               | 1 | 1 | 2 | 2 |
| lettuce        | Fruits & Vegetables | 1 | 1 | 2 | 2 |
| dentist        | Occupations         | 1 | 1 | 2 | 2 |
| onion          | Fruits & Vegetables | 1 | 1 | 2 | 2 |
| airplane       | Transportation      | 1 | 1 | 2 | 2 |
| judge          | Occupations         | 1 | 1 | 2 | 2 |
| submarine      | Transportation      | 1 | 1 | 2 | 2 |
| donkey         | 4-Legged Animals    | 1 | 1 | 2 | 2 |
| eagle          | Birds               | 1 | 1 | 2 | 2 |
| peach          | Fruits & Vegetables | 1 | 1 | 2 | 2 |
| llama          | 4-Legged Animals    | 1 | 1 | 2 | 2 |
| pigeon         | Birds               | 1 | 1 | 2 | 2 |
| moose          | 4-Legged Animals    | 1 | 1 | 2 | 2 |
| wheelchair     | Transportation      | 1 | 1 | 2 | 2 |
| plumber        | Occupations         | 1 | 1 | 2 | 2 |
| lawyer         | Occupations         | 1 | 1 | 2 | 2 |
| wheelbarrow    | Tools               | 1 | 1 | 2 | 2 |
| banjo          | Musical Instruments | 1 | 1 | 2 | 2 |
| basketball     | Sports Equipment    | 1 | 1 | 2 | 2 |
| sled           | Transportation      | 1 | 1 | 2 | 2 |
| vulture        | Birds               | 1 | 1 | 2 | 2 |
| canoe          | Transportation      | 1 | 1 | 2 | 2 |
| butcher        | Occupations         | 1 | 1 | 2 | 2 |
| waiter         | Occupations         | 1 | 1 | 2 | 2 |
| firetruck      | Transportation      | 1 | 1 | 2 | 2 |
| bagpipe        | Musical Instruments | 1 | 1 | 2 | 2 |
| motorcycle     | Transportation      | 1 | 1 | 2 | 2 |
| cherry         | Fruits & Vegetables | 1 | 1 | 2 | 2 |
| cone           | Sports Equipment    | 1 | 1 | 2 | 2 |
| nun            | Occupations         | 1 | 1 | 2 | 2 |
| axe            | Tools               | 1 | 1 | 2 | 2 |
| teacher        | Occupations         | 1 | 1 | 2 | 2 |
| chick          | Birds               | 1 | 1 | 2 | 2 |
| policeman      | Occupations         | 1 | 1 | 2 | 2 |
| buffalo        | 4-Legged Animals    | 1 | 1 | 2 | 2 |
| tennis ball    | Sports Equipment    | 1 | 1 | 2 | 2 |
| golf club      | Sports Equipment    | 1 | 1 | 2 | 2 |
| raisins        | Fruits & Vegetables | 1 | 1 | 2 | 2 |
| penguin        | Birds               | 1 | 1 | 2 | 2 |
| bongo(drum)    | Musical Instruments | 1 | 1 | 2 | 2 |
| crow           | Birds               | 1 | 1 | 2 | 2 |
| flute          | Musical Instruments | 1 | 1 | 2 | 2 |
| polar bear     | 4-Legged Animals    | 1 | 1 | 2 | 2 |
| robin          | Birds               | 1 | 1 | 2 | 2 |
| dove           | Birds               | 1 | 1 | 2 | 2 |
| porcupine      | 4-Legged Animals    | 1 | 1 | 2 | 2 |
| deer           | 4-Legged Animals    | 1 | 1 | 2 | 2 |
| mechanic       | Occupations         | 1 | 1 | 2 | 2 |
| bear           | 4-Legged Animals    | 1 | 1 | 2 | 2 |
| helmet         | Sports Equipment    | 1 | 1 | 2 | 2 |
| beaver         | 4-Legged Animals    | 1 | 1 | 2 | 2 |
| rooster        | Birds               | 1 | 1 | 2 | 2 |
| stewardess     | Occupations         | 1 | 1 | 2 | 2 |
| turtle         | 4-Legged Animals    | 1 | 1 | 2 | 2 |

|             |                     |   |   |   |  |   |
|-------------|---------------------|---|---|---|--|---|
| watermelon  | Fruits & Vegetables | 1 | 1 | 2 |  | 2 |
| police car  | Transportation      | 1 | 1 | 2 |  | 2 |
| shovel      | Tools               | 1 | 1 | 2 |  | 2 |
| hummingbird | Birds               | 1 | 1 | 2 |  | 2 |
| baseball    | Sports Equipment    | 1 | 1 | 2 |  | 2 |
| violin      | Musical Instruments | 1 | 1 | 2 |  | 2 |
| cardinal    | Birds               | 1 | 1 | 2 |  | 2 |
| lifeguard   | Occupations         | 1 | 1 | 2 |  | 2 |
| stroller    | Transportation      | 1 | 1 | 2 |  | 2 |
| lizard      | 4-Legged Animals    | 1 | 1 | 2 |  | 2 |
| panda       | 4-Legged Animals    | 1 | 1 | 2 |  | 2 |
| puck        | Sports Equipment    | 1 | 1 | 2 |  | 2 |
