# Supplementary material
Source: publisher figshare collection journal article supplement (https://asha.figshare.com/articles/dataset/_/5734113)
Supplement: Supplementary file 5 [file 1]

### Supplemental Material S3. Eligible items by category (sample).

Eligible items were determined based on naming task performance (see Supplemental Material S2). In order to qualify for treatment, a category was required to minimally contain 10 eligible items (to allow for generating both a five-item treatment list and a five-item untreated semantically related list to assess within-category generalization). In this example, five categories met this criterion (light green) and final list selection was determined based on participant preference (in bold).

|                            |           |
|----------------------------|-----------|
| 4-Legged Animals           | 7         |
| Birds                      | 6         |
| Fruits & Vegetables        | 19        |
| <b>Musical Instruments</b> | <b>13</b> |
| Occupations                | 9         |
| <b>Sports Equipment</b>    | <b>14</b> |
| <b>Tools</b>               | <b>18</b> |
| Transportation             | 11        |
